# Supplementary material
Source: publisher figshare collection journal article supplement (https://gsapubs.figshare.com/articles/dataset/_/13020662)
Supplement: Supplementary file 1 [file 1]

Table S1B. Radiocarbon and luminescence ages from the Kalaloch sites. The calibrated age is the median probability calculated in CALIB 7.1 (Stuiver et al., 2019) which is based on IntCal13 (Reimer et al., 2013). As ages discussed in the text are based on different types of dating, i.e., radiocarbon and luminescence (OSL and IRSL), all ages are presented in units of ka (thousands of years before present). Only ages less than 30 ka are shown for the Kalaloch section.

| Section name;<br>depth (m) | Method           | Lab Code    | C-14 or OSL age<br>(yr BP $\pm$ 1 $\sigma$ ) | Calibrated age (ka, median<br>and 95% range) | Reference         |
|----------------------------|------------------|-------------|----------------------------------------------|----------------------------------------------|-------------------|
| K1; 3.0                    | Radiometric C-14 | Y-2313      | 16,700 $\pm$ 160                             | 20.15 (19.74–20.55)                          | Stuiver, 1969     |
| K2; 3.4                    | Radiometric C-14 | Y2314       | 17,970 $\pm$ 300                             | 21.70 (21.02–22.42)                          | Stuiver, 1969     |
| K3; 4.6                    | Radiometric C-14 | Y-2315      | 18,100 $\pm$ 250                             | 21.92 (21.31–22.46)                          | Stuiver, 1969     |
| K5; 8.9                    | AMS C-14         | CURL-5575   | 20,400 $\pm$ 95                              | 24.51 (24.22–24.92)                          | Ashworth (unpub.) |
| K5; 9.0                    | Radiometric C-14 | Y-2422      | 21,450 $\pm$ 300                             | 25.73 (25.15–26.32)                          | Stuiver, 1969     |
| K5; 9.5                    | Radiometric C-14 | Y-2423      | 24,300 $\pm$ 300                             | 28.33 (27.78–28.90)                          | Stuiver, 1969     |
| 13.5                       | Radiometric C-14 | Y-2536      | 34,100 $\pm$ 800                             | 38.56 (36.58–40.33)                          | Heusser, 1972     |
| 15.0                       | Radiometric C-14 | Y-2316      | 40,800 $\pm$ 1000                            | 44.41 (42.89–46.10)                          | Stuiver, 1969     |
| 15.2                       | Radiometric C-14 | Y-2317      | 39,800 $\pm$ 1200                            | 43.71 (42.11–45.69)                          | Stuiver, 1969     |
| 15.6                       | Radiometric C-14 | Y-2318      | 40,200 $\pm$ 1000                            | 43.94 (42.55–45.58)                          | Stuiver, 1969     |
| 16.2                       | Radiometric C-15 | Y-2319      | 39,000 $\pm$ 1200                            | 43.10 (41.56–45.12)                          | Stuiver, 1969     |
| 16.5                       | Radiometric C-16 | Y-2320      | 40,000 $\pm$ 1200                            | 43.85 (42.23–45.85)                          | Stuiver, 1969     |
| 16.8                       | Radiometric C-17 | Y-2321      | 42,700 $\pm$ 1600                            | 46.33 (44.00–49.47)                          | Stuiver, 1969     |
| 17.5                       | Radiometric C-18 | Y-2322      | >47,000                                      | –                                            | Stuiver, 1969     |
| 18.0                       | Radiometric C-19 | Y-2323      | >47,000                                      | –                                            | Stuiver, 1969     |
| 28.0                       | IRSL             | USU-906FELD | 73,940 $\pm$ 16,900                          | –                                            | Marshall, 2013    |
| 28.1                       | OSL              | USU- 906EBG | 77,620 $\pm$ 15,300                          | –                                            | Marshall, 2013    |

Heusser, C.J., 1972, Palynology and phytogeographical significance of a late-Pleistocene refugium near Kalaloch, Washington: *Quaternary Research*: v.2(2), p. 189-201, [doi.org/10.1016/0033-5894\(72\)90038-5](https://doi.org/10.1016/0033-5894(72)90038-5).

Marshall, K.J., 2013, Expanded Late Pleistocene glacial chronology for Western Washington, U.S.A and the Wanaka-Hawea Basin, New Zealand, using luminescence dating of glaciofluvial outwash: [M.S. Thesis] Idaho State University, 144 p.

Reimer, P.J., Bard, E., Bayliss, A., Beck, J.W., Blackwell, P.G., Bronk Ramsey, C., Buck, C.E., Cheng, H., Edwards, R.L., Friedrich, M., Grootes, P.M., Guilderson, T.P., Hafliðason, H., Hajdas, I., Hatté, C., Heaton, T.J., Hogg, A.G., Hughen, K.A., Kaiser, K.F., Kromer, B., Manning, S.W., Niu, M., Reimer, R.W., Richards, D.A., Scott, E.M., Southon, J.R., Turney C.S.M., and van der Plicht, J., 2013, IntCal13 and MARINE13 radiocarbon age calibration curves 0-50000 years calBP: *Radiocarbon*, v.55(4), p. 1869-1887, [doi: 10.2458/azu\\_js\\_rc.55.16947](https://doi.org/10.2458/azu_js_rc.55.16947).

Stuiver, M., 1969, Yale natural radiocarbon measurements IX. *Radiocarbon* 11, 545-658.

Stuiver, M., Reimer, P.J., and Reimer, R.W., 2019, CALIB 7.1 [WWW program], <http://calib.org> (accessed October 2019).
