# Supplementary material
Source: publisher figshare collection journal article supplement (https://gsapubs.figshare.com/articles/dataset/_/13020662)
Supplement: Supplementary file 4 [file 1]

# Fossil beetle fragments from the Kalaloch and South Fork of the Hoh River sites

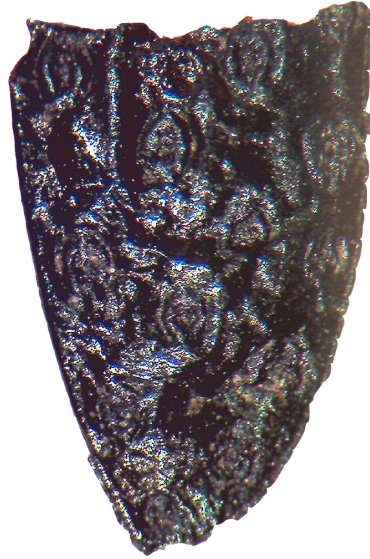

*Elaphrus clairvillei*  
frag. right elytron

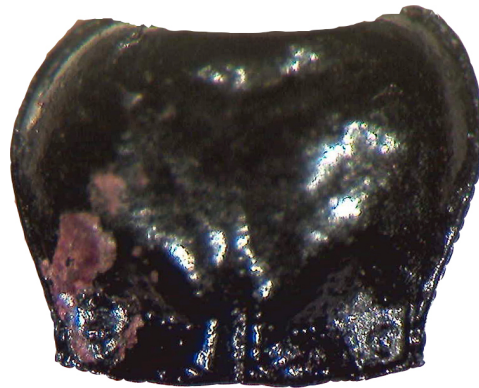

*Patrobus fossifrons*  
pronotum

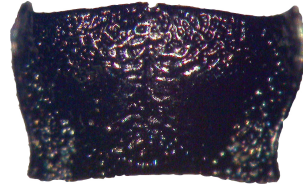

*Notiophilus sylvaticus*  
pronotum

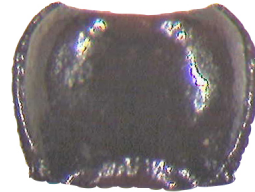

*Trechus chalybeus*  
pronotum

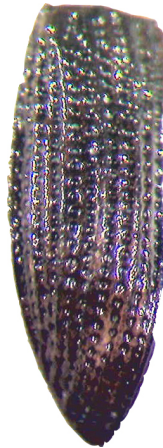

*Helophorus auricollis*  
left elytron

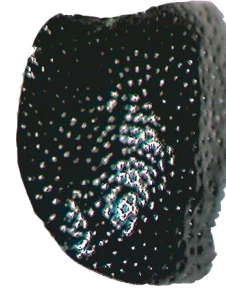

*Olophrum rotundicolle*  
frag. pronotum

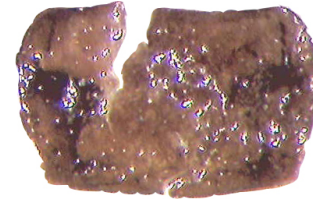

*Olophrum boreale*  
pronotum

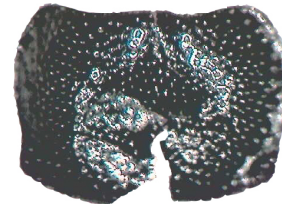

*Olophrum consimile*  
pronotum

1 mm

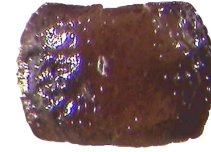

*Arpedium cribratum*  
pronotum

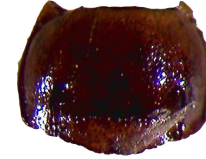

*Neocrepidodera robusta*  
pronotum

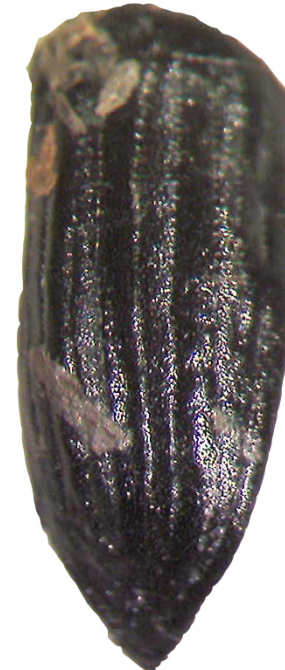

*Cytilus alternatus*  
right elytron
